# Supplementary material
Source: HighWire-hosted journal article supplement (https://bmjopen.bmj.com/content/14/9/e085806)
Supplement: inline-supplementary-material-1 [file inline-supplementary-material-1.pdf]

### Combining Electronic Health Records Data from a Clinical Research Network with Registry Data to Examine Long-term Outcomes of Interventions and Devices: An Observational Cohort Study

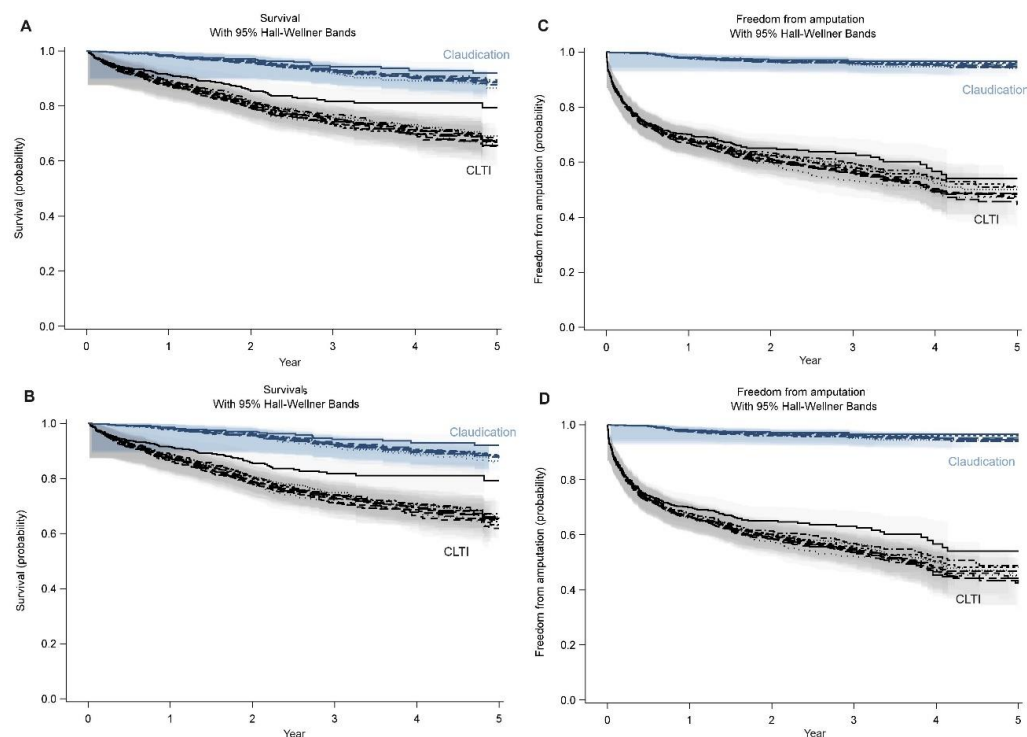

Supplementary Figure. Hypothetical analysis of 5-year survival (A, B) and freedom from amputation (C, D) with patients discontinued in the EHR at 50% (A, C) and 100% (B, D) increased risk of experiencing the events than average.
